# Supplementary material for: Development of a Highly Sensitive and Specific ic-ELISA and Lateral Flow Immunoassay for Diacetoxyscirpenol
Source: Foods. 2022 May 25;11(11):1548. doi: 10.3390/foods11111548 (PMC9180083; doi:10.3390/foods11111548)
Supplement: Supplementary file 1 [file foods-11-01548-s001.zip › foods-1709637-supplementary.pdf]

# Development of a highly sensitive and specific ic-ELISA and a lateral flow immunoassay for diacetoxyscirpenol

Shibei Shao, Wenhua Shang, Yuchen Bai, Suxia Zhang, Jianzhong Shen, Zhanhui Wang and Kai Wen\*

Beijing Laboratory for Food Quality and Safety, Beijing Key Laboratory of Detection Technology for Animal-Derived Food Safety, College of Veterinary Medicine, China Agricultural University, Beijing 100193, China; shaoshibeil@cau.edu.cn (S.S.); s20213050793@cau.edu.cn (W.S.); BS20193050465@cau.edu.cn (Y.B.); suxia@cau.edu.cn (S.Z.); sjz@cau.edu.cn (J.S.); wangzhanhui@cau.edu.cn (Z.W.)

\* Correspondence: Correspondence: wenkai@cau.edu.cn

## Buffers and solutions

Stock standard solutions (5 g/L) of all analytes were prepared by dissolving an appropriate amount of each standard in N, N-dimethylformamide (DMF). The individual stock solutions were stored at  $-20^{\circ}\text{C}$  in amber glass bottles. Working standards of each analyte were prepared by diluting the stock standard solution in assay buffer and were stored at  $4^{\circ}\text{C}$ .

The following buffers were used in the enzyme-linked immunosorbent assay (ELISA): (1) coating buffer was 0.05 M carbonate buffer, pH 9.6; (2) blocking buffer consisted of 0.01 M phosphate buffered saline (PBS, pH 7.4) with 0.5% BSA, and 0.01% Tween 20; (3) washing buffer was 0.01 M PBS with 0.05% Tween 20; (4) antibody dilution buffer was 0.01 M PBS containing 0.2% albumin; (5) the enzyme labeled secondary antibody dilution buffer was the antibody dilution buffer containing 5% albumin; (6) substrate was 0.1% 3,3',5,5'-tetramethylbenzidine and 50%  $\text{H}_2\text{O}_2$  in 0.05 M citrate buffer, pH 4.5; and (7) the stopping reagent was 2 M  $\text{H}_2\text{SO}_4$ .

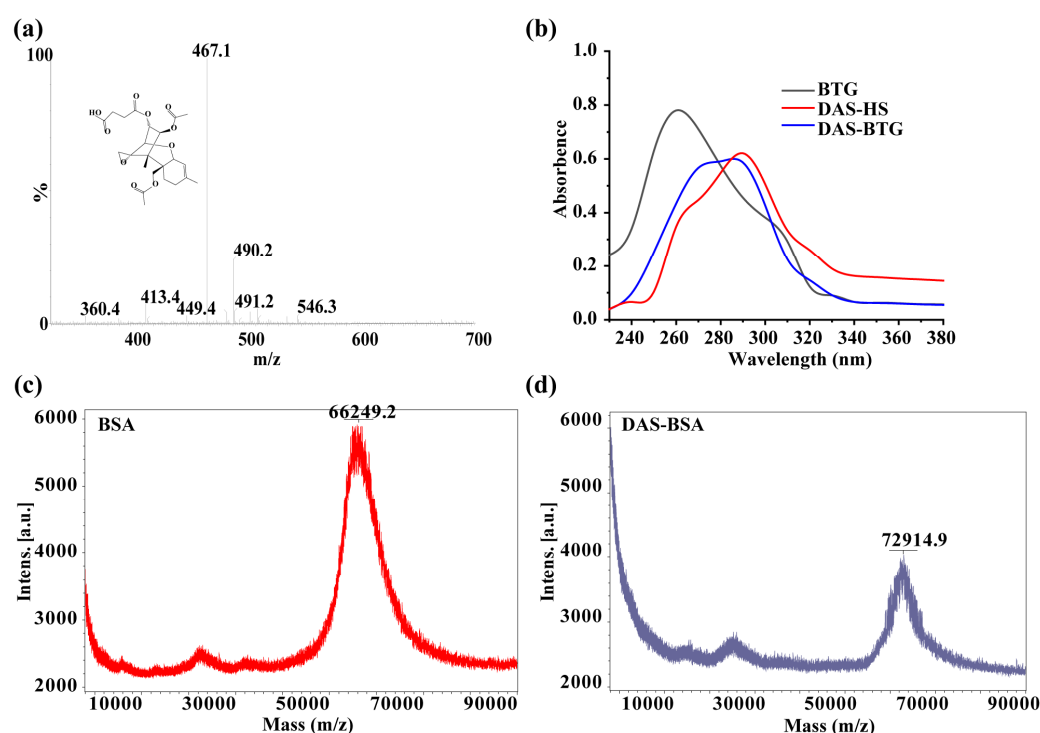

**Figure S1.** Characterizations of DAS hapten and antigen, (a) mass spectra of hapten DAS-HS, (b) UV-vis spectrum of DAS immunogen, matrix-assisted laser desorption/ionization time of flight mass spectrometry characterization of (c) BSA standard and (d) coating antigen DAS-BSA.

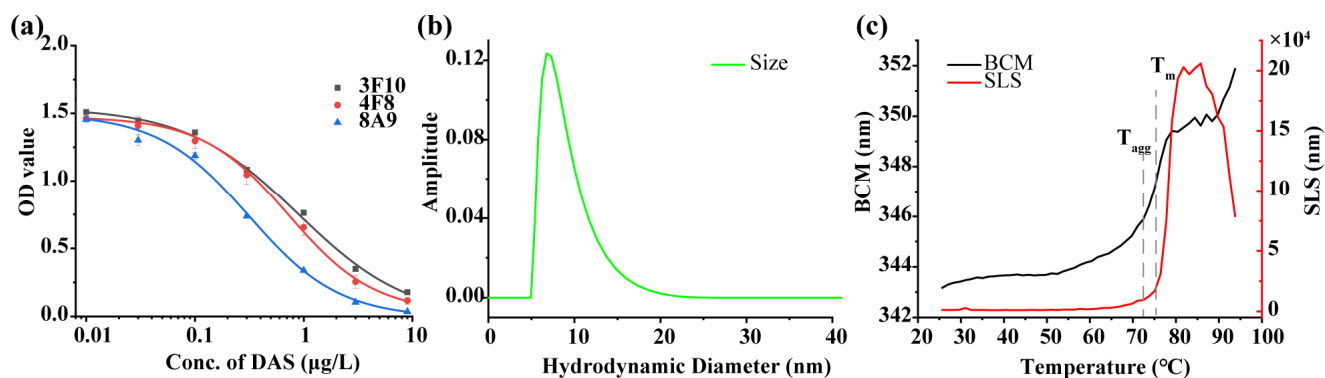

**Figure S2.** Characterizations of DAS mAb. (a) inhibition curves of different cell lines of DAS, (b) size of mAb in buffer, (c) stability of mAb 8A9.

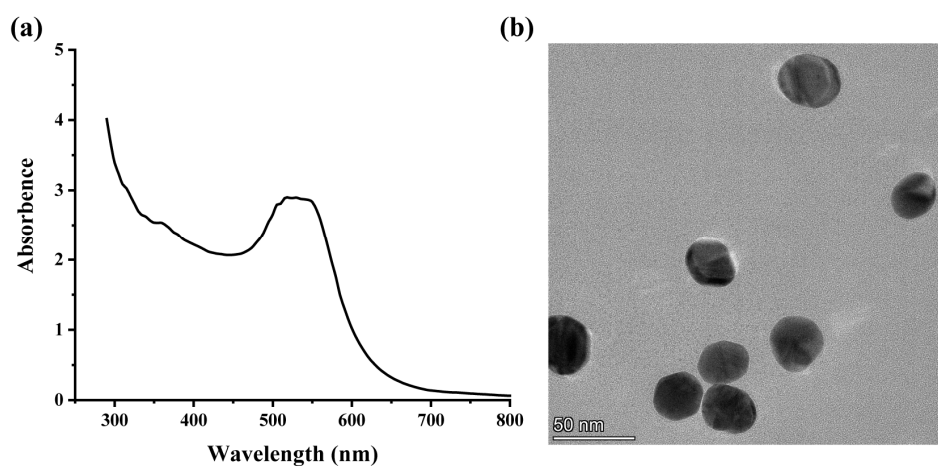

**Figure S3.** Characterizations of AuNPs, (a) UV-vis, (b) Transmission electron microscopy.

**Table S1.** Primers used for PCR amplification.

| Primer                  | Sequences (5'-3')                                         |
|-------------------------|-----------------------------------------------------------|
| AS-Linker               | PO <sub>4</sub> -CTGCAGAAAGCTTGGTGGATCCTA-NH <sub>2</sub> |
| AS04-Primer             | TAGGATCCACCAAGCTTTCTGCAG                                  |
| IgG <sub>1</sub> Primer | GTCGACTCATTTACCAGGAGAGTGGAAGAGG                           |
| Lambda Primer           | CTC GAG TCC AGA CTC TTC TCC ACA GTG TC                    |
| pJB33F                  | GGCTTTACACTTTATGCTTCCG                                    |
| pJB33R                  | CGAGAAAGGAAGGGAAGAAAGC                                    |
